# Supplementary material for: Mode of action- and cause-specific drug retention of b/tsDMARDs in anti-SS-A antibody-positive rheumatoid arthritis: the ANSWER cohort study
Source: Research Square preprint supplement (doi:10.21203/rs.3.rs-7669680/v1), 2025-10-20
Supplement: Supplementary file 1 [file dbb37f54768d76a46e95354f.docx]

**Supplementary Table 1. Baseline characteristics of patients before and after propensity score matching.**

|  | **Before Matching** | | | | **After Matching** | | | |
| --- | --- | --- | --- | --- | --- | --- | --- | --- |
| **Variable** | **Overall** | **anti-SS-A antibody** | | **Difference** | **Overall** | **anti-SS-A antibody** | | **Difference** |
| **Negative** | **Positive** | **Negative** | **Positive** |
| N = 1,452 | N = 1,197 | N = 255 | N = 883 | N = 628 | N = 255 |
| Age (years) | 59 ± 16 | 60 ± 16 | 55 ± 15 | 0.30 | 55 ± 16 | 55 ± 17 | 55 ± 15 | 0.03 |
| Sex |  |  |  | 0.54 |  |  |  | 0.04 |
| Male | 281 (19%) | 269 (22%) | 12 (4.7%) |  | 47 (5.3%) | 35 (5.6%) | 12 (4.7%) |  |
| Female | 1,171 (81%) | 928 (78%) | 243 (95%) |  | 836 (95%) | 593 (94%) | 243 (95%) |  |
| Disease Duration  (months) | 92 ± 115 | 91 ± 117 | 98 ± 106 | -0.07 | 93 ± 103 | 90 ± 102 | 98 ± 106 | -0.08 |
| PSL (mg/day) | 1.5 ± 3.9 | 1.5 ± 4.0 | 1.3 ± 2.9 | 0.06 | 1.4 ± 3.4 | 1.4 ± 3.6 | 1.3 ± 2.9 | 0.02 |
| MTX (mg/week) | 3.5 ± 5.1 | 3.5 ± 4.9 | 3.7 ± 5.7 | -0.05 | 3.9 ± 5.3 | 4.0 ± 5.1 | 3.7 ± 5.7 | 0.05 |
| RF positive | 1,040 (74%) | 831 (71%) | 209 (85%) | -0.33 | 731 (83%) | 514 (82%) | 217 (85%) | -0.09 |
| ACPA positive | 1,020 (76%) | 825 (74%) | 195 (84%) | -0.24 | 745 (84%) | 531 (85%) | 214 (84%) | 0.02 |
| Max  b/tsDMARDs Line | 2 ± 2 | 2 ± 2 | 2 ± 2 | -0.18 | 2 ± 2 | 2 ± 2 | 2 ± 2 | -0.05 |
| CDAI | 18 ± 11 | 18 ± 11 | 18 ± 11 | -0.03 | 17 ± 11 | 17 ± 11 | 17 ± 11 | -0.01 |
| Stage |  |  |  | -0.11 |  |  |  | -0.05 |
| 1 | 504 (42%) | 423 (43%) | 81 (38%) |  | 349 (40%) | 250 (40%) | 99 (39%) |  |
| 2 | 290 (24%) | 238 (24%) | 52 (24%) |  | 215 (24%) | 157 (25%) | 58 (23%) |  |
| 3 | 160 (13%) | 127 (13%) | 33 (15%) |  | 123 (14%) | 84 (13%) | 39 (15%) |  |
| 4 | 250 (21%) | 201 (20%) | 49 (23%) |  | 196 (22%) | 137 (22%) | 59 (23%) |  |
| Class |  |  |  | 0.12 |  |  |  | 0.02 |
| 1 | 363 (30%) | 293 (30%) | 70 (32%) |  | 290 (33%) | 208 (33%) | 82 (32%) |  |
| 2 | 620 (51%) | 505 (51%) | 115 (53%) |  | 446 (51%) | 311 (50%) | 135 (53%) |  |
| 3 | 208 (17%) | 180 (18%) | 28 (13%) |  | 138 (16%) | 103 (16%) | 35 (14%) |  |
| 4 | 18 (1.5%) | 15 (1.5%) | 3 (1.4%) |  | 9 (1.0%) | 6 (1.0%) | 3 (1.2%) |  |

Values are presented as mean ± standard deviation (SD) for continuous variables, and n (%) for categorical variables. “Difference” indicates the standardized mean difference (SMD) between anti-SS-A antibody-positive and -negative groups. “Before” and “After matching” refer to datasets prior to and following propensity score matching, respectively. Baseline was defined at the initiation of the first biologic and targeted synthetic disease-modifying antirheumatic drug (b/tsDMARD) course included in the study. Propensity score matching was performed using the following covariates: age, sex, disease duration, glucocorticoid dosage, methotrexate dosage, seropositivity (RF, ACPA), CDAI, stage, class, maximum number of b/tsDMARDs, and prior b/tsDMARDs. For presentation, this supplementary table shows one representative dataset from the 100 multiply imputed datasets. Similar trends were observed across the other imputed datasets, with all post-matching SMDs < 0.20.

**Abbreviations**: ACPA, anti-citrullinated peptide antibody; bDMARDs, biological disease-modifying antirheumatic drugs; CDAI, Clinical Disease Activity Index; DMARDs, disease-modifying antirheumatic drugs; MTX, methotrexate; PSL, prednisolone; RF, rheumatoid factor; tsDMARDs, targeted synthetic disease-modifying antirheumatic drugs.
